# Supplementary material for: Dietary Folic Acid Supplementation Attenuates Maternal High-Fat Diet-Induced Fetal Intrauterine Growth Retarded via Ameliorating Placental Inflammation and Oxidative Stress in Rats
Source: MDPI journal article supplement (doi:10.3390/nu15143263), 2023-07-24
Supplement: s1 [file s1]

Table S1. Composition of the diets

| Diet component                        | CON      | HFD      | FA       | HFD+FA   |
|---------------------------------------|----------|----------|----------|----------|
| Casein (g/kg)                         | 189.57   | 258.46   | 189.57   | 258.46   |
| Corn starch (g/kg)                    | 479.81   | n/a      | 479.81   | n/a      |
| Maltodextrin (g/kg)                   | 118.48   | 161.54   | 118.48   | 161.54   |
| Sucrose (g/kg)                        | 65.21    | 88.91    | 65.21    | 88.91    |
| Cellulose (g/kg)                      | 47.39    | 64.62    | 47.39    | 64.62    |
| Pork lard (g/kg)                      | 18.96    | 316.62   | 18.96    | 316.62   |
| Soya bean oil (g/kg)                  | 23.70    | 32.31    | 23.70    | 32.31    |
| Cystine (g/kg)                        | 2.84     | 3.88     | 2.84     | 3.88     |
| Mineral mix (g/kg)                    | 9.48     | 12.92    | 9.48     | 12.92    |
| Vitamin mix without folic acid (g/kg) | 9.48     | 12.92    | 9.48     | 12.92    |
| Choline (g/kg)                        | 1.90     | 2.58     | 1.90     | 2.58     |
| Calcium carbonate (g/kg)              | 5.215.21 | 7.117.11 | 5.215.21 | 7.117.11 |
| Dicalcium phosphate (g/kg)            | 12.32    | 16.80    | 12.32    | 16.80    |
| Potassium citrate (g/kg)              | 15.64    | 21.32    | 15.64    | 21.32    |
| Folic acid (mg/kg)                    | 2        | 2        | 5        | 5        |

CON, normal fat with normal folic acid diet; HFD, high fat with normal folic acid diet; FA, normal fat with folic acid supplementation diet; HFD+FA, high fat with folic acid supplementation diet; n/a, not applicable.

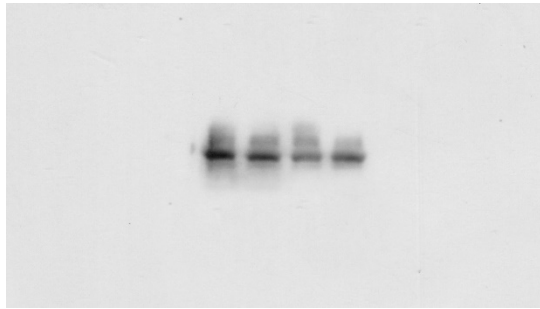

**Figure S1: SIRT1 in the placenta of Western blot.** The molecular mass was 120KD. The sample loading sequence was the CON group, FA group, HFD group and HFD+FA group from left to right.

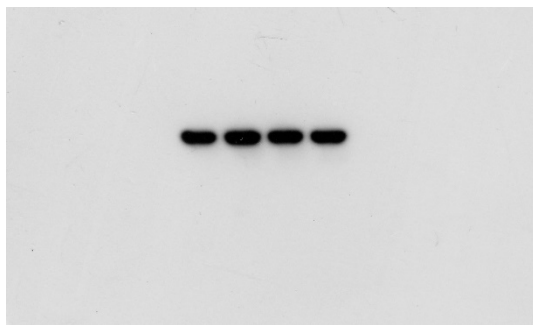

**Figure S2:  $\beta$ -actin in the placenta of Western blot.** The molecular mass was 45KD. The sample loading sequence was the CON group, FA group, HFD group and HFD+FA group from left to right.

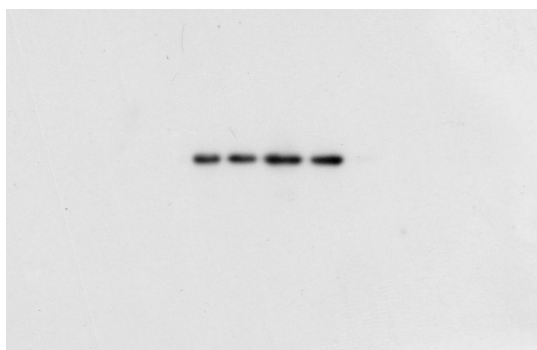

**Figure S3: Nucl p65 in the placenta of Western blot.** The molecular mass was 65KD. The sample loading sequence was the CON group, FA group, HFD group and HFD+FA group from left to right.

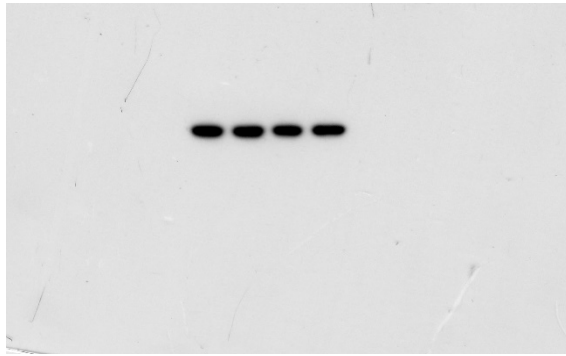

**Figure S4: Lamin B in the placenta of Western blot.** The molecular mass was 68KD. The sample loading sequence was the CON group, FA group, HFD group and HFD+FA group from left to right.

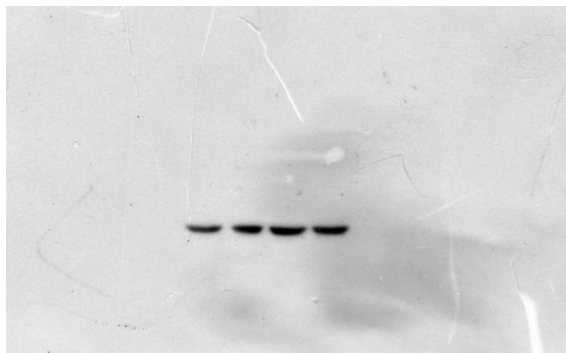

**Figure S5: Cyto p65 in the placenta of Western blot.** The molecular mass was 65KD. The sample loading sequence was the CON group, FA group, HFD group and HFD+FA group from left to right.

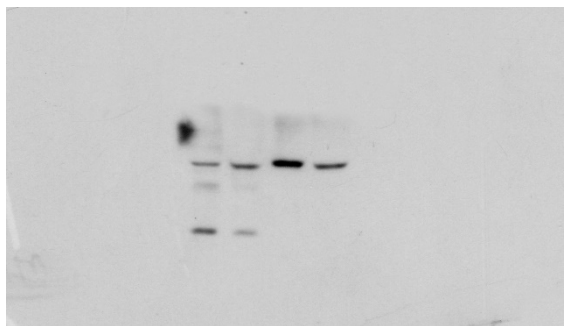

**Figure S6: p-IκBa in the placenta of Western blot.** The molecular mass was 40KD. The sample loading sequence was the CON group, FA group, HFD group and HFD+FA group from left to right.

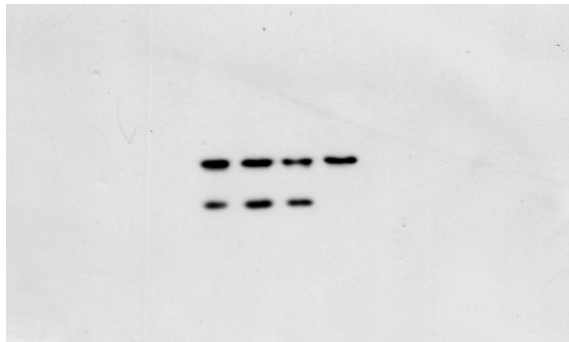

**Figure S7: IkBa in the placenta of Western blot.** The molecular mass was 39KD. The sample loading sequence was the CON group, FA group, HFD group and HFD+FA group from left to right.

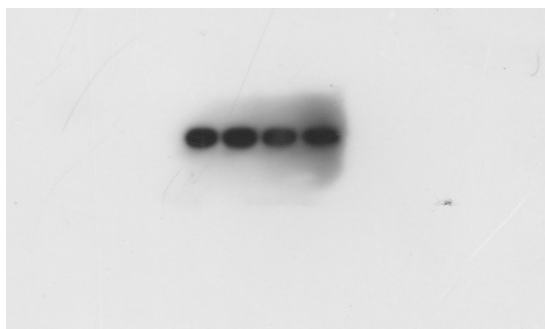

**Figure S8:  $\beta$ -actin in the placenta of Western blot.** The molecular mass was 45KD. The sample loading sequence was the CON group, FA group, HFD group and HFD+FA group from left to right.

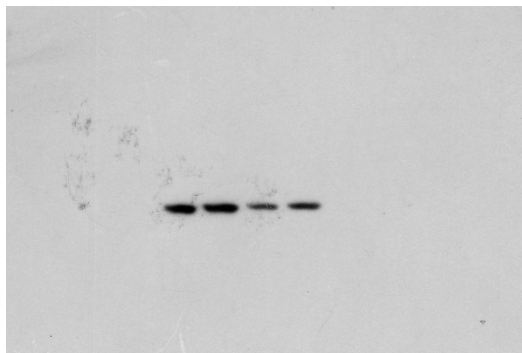

**Figure S9: Nucl Nrf2 in the placenta of Western blot.** The molecular mass was 100KD. The sample loading sequence was the CON group, FA group, HFD group and HFD+FA group from left to right.

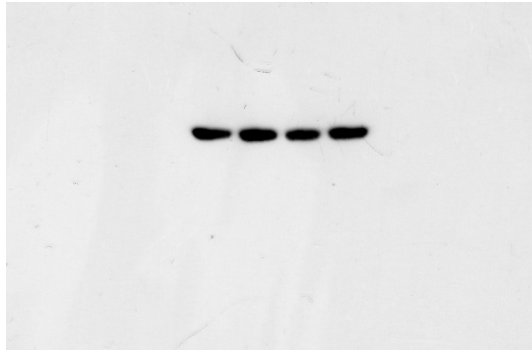

**Figure S10: Lamin B in the placenta of Western blot.** The molecular mass was 68KD. The sample loading sequence was the CON group, FA group, HFD group and HFD+FA group from left to right.

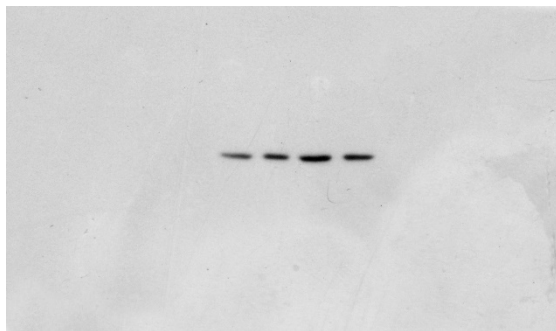

**Figure S11: Cyto Nrf2 in the placenta of Western blot.** The molecular mass was 100KD. The sample loading sequence was the CON group, FA group, HFD group and HFD+FA group from left to right.

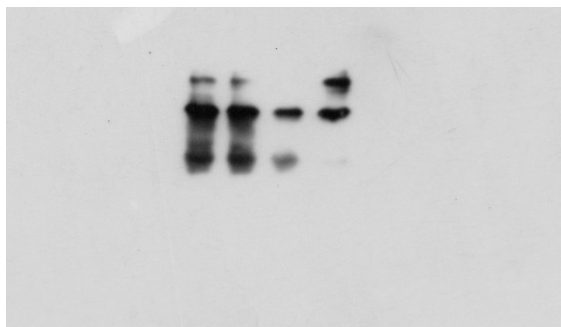

**Figure S12: NQO1 in the placenta of Western blot.** The molecular mass was 29KD. The sample loading sequence was the CON group, FA group, HFD group and HFD+FA group from left to right.

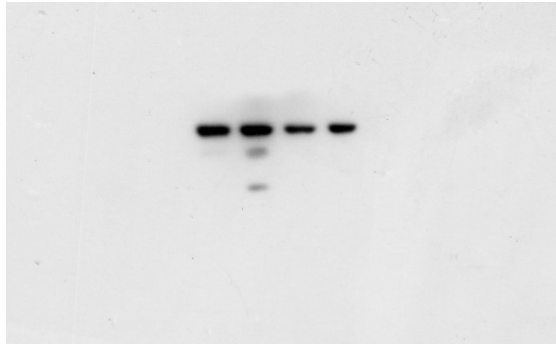

**Figure S13: HO-1 in the placenta of Western blot.** The molecular mass was 28KD. The sample loading sequence was the CON group, FA group, HFD group and HFD+FA group from left to right.

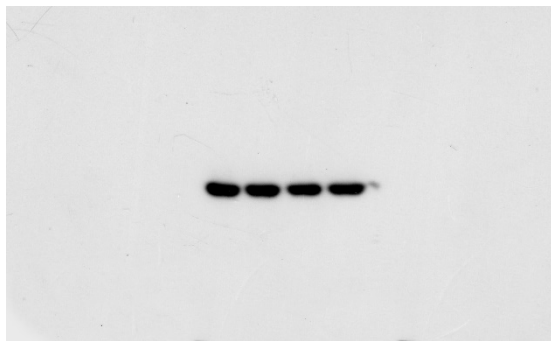

**Figure S14:  $\beta$ -actin in the liver of Western blot.** The molecular mass was 45KD. The sample loading sequence was the CON group, FA group, HFD group and HFD+FA group from left to right.
